# Supplementary material for: First principles study of a triazine-based covalent organic framework as a high-capacity anode material for Na/K-ion batteries
Source: Royal Society of Chemistry journal article supplement (doi:10.1039/d3cp04721k), 2023-12-08
Supplement: d3cp04721k1.pdf [file d3cp04721k1.pdf]

# Supporting Information

## First principles study of triazine-based covalent organic framework as a high capacity anode material for Na/K-ion batteries

Sitong Liu,<sup>a</sup> Bo Liu,<sup>a\*</sup> Meidong Yu,<sup>a</sup> Hanyu Gao,<sup>a</sup> Haipeng Guo,<sup>a</sup> Daguo Jiang,<sup>a</sup> Shenbo Yang,<sup>b</sup> Yufeng Wen,<sup>a\*</sup> and  
Yabei Wu<sup>c</sup>

<sup>a</sup> *College of Mathematics and Physics, Jinggangshan University, Ji'an, Jiangxi 343009, China*

<sup>b</sup> *Hongzhiwei Technology (Shanghai) Co. Ltd., 1599 Xinjinqiao Road, Pudong, Shanghai, China*

<sup>c</sup> *Department of Materials Science and Engineering and Guangdong Provincial Key Lab for Computational Science  
and Materials Design, Southern University of Science and Technology, Shenzhen, Guangdong 518055, China*

\*E-mail: Bo Liu (liubo@jgsu.edu.cn)

Yufeng Wen (wenyufeng@jgsu.edu.cn)

**Table S1.** Two different stacking patterns with the same bilayer TCOF formula and their relative energy.

|                      |                                                                                   |                                                                                    |
|----------------------|-----------------------------------------------------------------------------------|------------------------------------------------------------------------------------|
| Top view             | 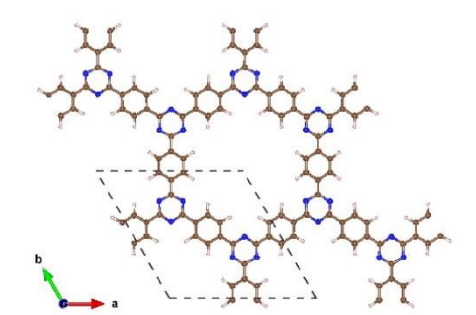 |  |
| Side view            |  |  |
| Stacking patterns    | AA                                                                                | AB                                                                                 |
| Relative energy (eV) | 0                                                                                 | 17.13                                                                              |

**Table S2.** Adsorption energies for Na/K at different adsorption sites on bilayer TCOF.

| System     | Adsorption energy(eV) |          |          |          |        |        |           |        |        |
|------------|-----------------------|----------|----------|----------|--------|--------|-----------|--------|--------|
|            | $I_{H-H}$             | $I_{TN}$ | $I_{TC}$ | $I_{BC}$ | $I_B$  | $I_T$  | $T_{H-H}$ | $T_B$  | $T_T$  |
| Na-TCOF-AA | -1.259                | -1.243   | -1.253   | -0.795   | -0.773 | -0.311 | -0.558    | -0.284 | -0.039 |
| K-TCOF-AA  | -1.283                | -1.273   | -1.070   | -0.963   | -0.662 | -0.378 | -0.710    | -0.570 | -0.473 |

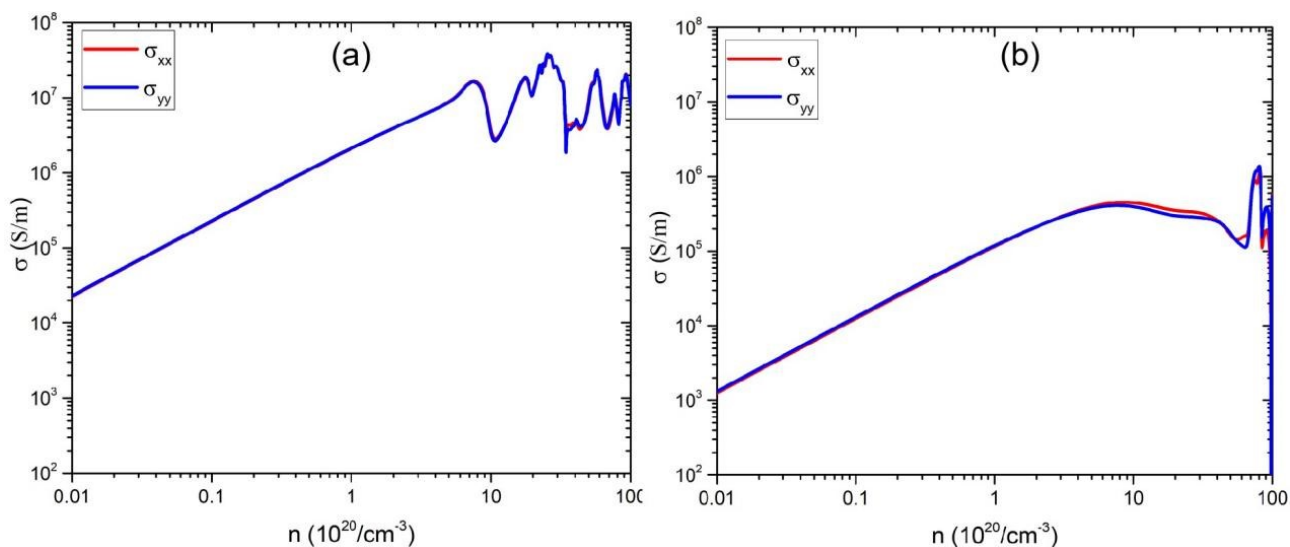

Figure S1. The electronic conductivity of the bilayer TCOF. (a) N-type and (b) P-type.

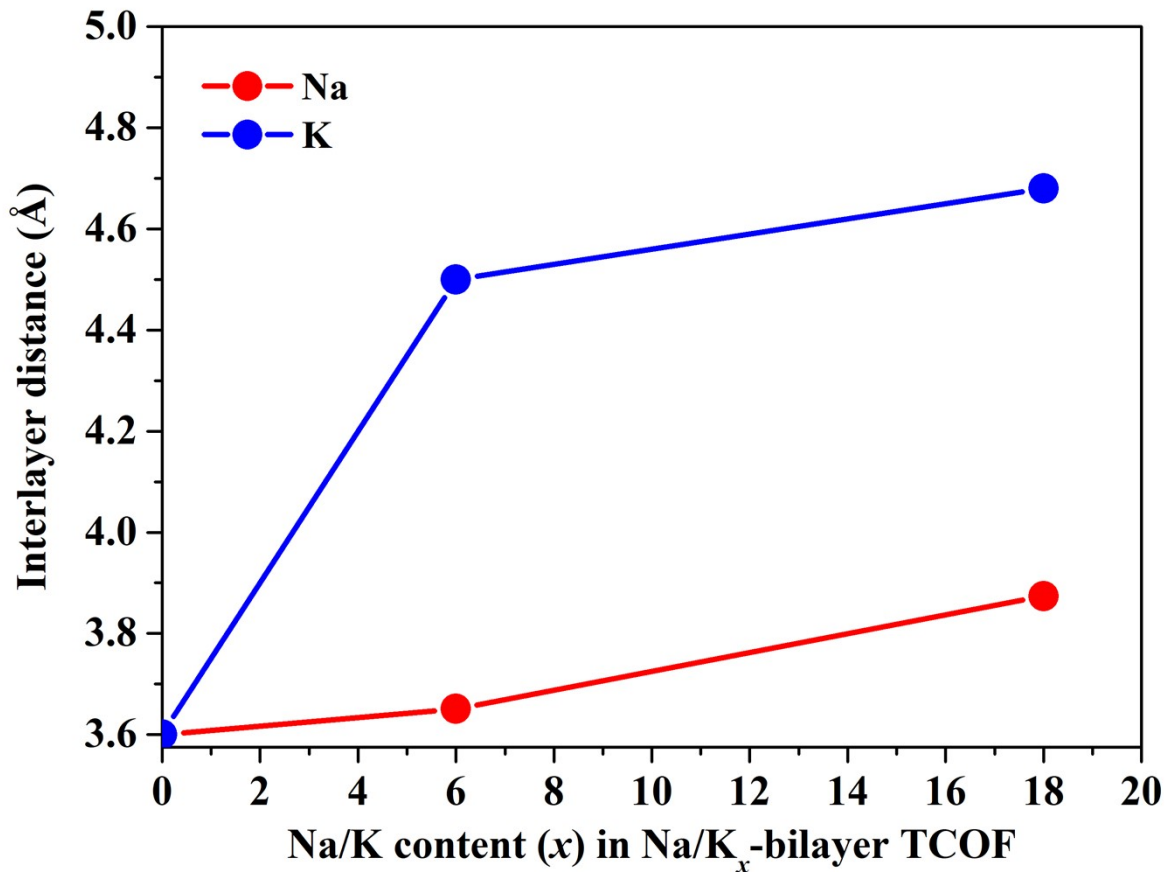

Figure S2. Interlayer distance profile diagram as a function of Na/K content (x) in the Na/K<sub>x</sub>-bilayer TCOF.

**Table S3.** Diffusion barriers, theoretical capacities and Open-circuit voltages of different 2D anode materials

| Anode materials                   | Diffusion barrier (eV) |             | Theoretical capacity (mAh/g) |        | Open-circuit voltage (V) |       | Ref |
|-----------------------------------|------------------------|-------------|------------------------------|--------|--------------------------|-------|-----|
|                                   | Na                     | K           | Na                           | K      | Na                       | K     |     |
| TCOF                              | 0.45                   | 0.26        | 628                          | 628    | 0.24                     | 0.19  |     |
| Bi-C                              | 0.217/0.169            | 0.179/0.136 | 485                          | 364    | 0.24                     | 0.32  | 1   |
| β-In <sub>2</sub> Se <sub>3</sub> | 0.14                   | 0.09        | 230                          | 230    | 0.03                     | 0.13  | 2   |
| B <sub>7</sub> N <sub>5</sub>     | 0.13                   | 0.10        | 367.9                        | 1471.5 | 0.22                     | 0.14  | 3   |
| BP                                | 0.217                  | 0.155       | 143                          | 570    | -                        | -     | 4   |
| B <sub>2</sub> S                  | 0.19                   | 0.04        | 998                          | 499    | 0.06                     | 0.18  | 5   |
| GeS                               | 0.090                  | 0.050       | 512                          | 256    | 0.13                     | 0.33  | 6   |
| Mo <sub>2</sub> CrC <sub>2</sub>  | 0.027                  | 0.021       | 297.91                       | 154.88 | -                        | -     | 7   |
| Ti <sub>3</sub> C <sub>2</sub>    | 0.096                  | 0.103       | 351.8                        | 191.8  | 0.137                    | 0.128 | 8   |
| MnC                               | 0.174                  | 0.138       | 475                          | 235    | -                        | -     | 9   |
| Mo <sub>2</sub> C                 | 0.019                  | 0.015       | 263                          | 263    | -                        | -     | 10  |
| MoN <sub>2</sub>                  | 0.56                   | 0.49        | 864                          | 432    | -                        | -     | 11  |
| Si <sub>3</sub> C                 | 0.34                   | 0.18        | 1115                         | 836    | -                        | -     | 12  |

## References

- (1) Ghani, A.; Ahmed, S.; Murtaza, A.; Muhammad, I.; Rehman, W. u.; Zhou, C.; Zuo, W. L.; Yang, S. Bi–C monolayer as a promising 2D anode material for Li, Na, and K-ion batteries. *Physical Chemistry Chemical Physics* **2023**, *25* (6), 4980-4986, 10.1039/D2CP04712H. DOI: 10.1039/D2CP04712H.
- (2) Wu, D.; Fu, B.; Wang, S.; Liang, Y.; Xie, Y.; Ye, X.; Sun, S. A theoretical study of high-performance  $\beta$ -In<sub>2</sub>Se<sub>3</sub> monolayer as the anode material for alkali-metal (Li/Na/K)-ion batteries. *Journal of Materials Science* **2023**, *58* (18), 7660-7672. DOI: 10.1007/s10853-023-08525-0.
- (3) Xiong, Y.; Wang, Y.; Ma, N.; Zhang, Y.; Luo, S.; Fan, J. First principles study of B<sub>7</sub>N<sub>5</sub> as a high capacity electrode material for K-ion batteries. *Physical Chemistry Chemical Physics* **2023**, 10.1039/D3CP02391E. DOI: 10.1039/D3CP02391E.
- (4) Jiang, H. R.; Shyy, W.; Liu, M.; Wei, L.; Wu, M. C.; Zhao, T. S. Boron phosphide monolayer as a potential anode material for alkali metal-based batteries. *Journal of Materials Chemistry A* **2017**, *5* (2), 672-679, 10.1039/C6TA09264K. DOI: 10.1039/C6TA09264K.
- (5) Lei, S.; Chen, X.; Xiao, B.; Zhang, W.; Liu, J. Excellent Electrolyte Wettability and High Energy Density of B<sub>2</sub>S as a Two-Dimensional Dirac Anode for Non-Lithium-Ion Batteries. *ACS Applied Materials & Interfaces* **2019**, *11* (32), 28830-28840. DOI: 10.1021/acsami.9b07219.
- (6) Li, F.; Qu, Y.; Zhao, M. Germanium sulfide nanosheet: a universal anode material for alkali metal ion batteries. *Journal of Materials Chemistry A* **2016**, *4* (22), 8905-8912, 10.1039/C6TA03210A. DOI: 10.1039/C6TA03210A.
- (7) Xiao, Y.; Zhang, W. Adsorption mechanisms of Mo<sub>2</sub>CrC<sub>2</sub> MXenes as potential anode materials for metal-ion batteries: A first-principles investigation. *Applied Surface Science* **2020**, *513*, 145883. DOI: <https://doi.org/10.1016/j.apsusc.2020.145883>.
- (8) Er, D.; Li, J.; Naguib, M.; Gogotsi, Y.; Shenoy, V. B. Ti<sub>3</sub>C<sub>2</sub> MXene as a High Capacity Electrode Material for Metal (Li, Na, K, Ca) Ion Batteries. *ACS Applied Materials & Interfaces* **2014**, *6* (14), 11173-11179. DOI: 10.1021/am501144q.
- (9) Chen, Q.; Wang, H.; Li, H.; Duan, Q.; Jiang, D.; Hou, J. Two-dimensional MnC as a potential anode material for Na/K-ion batteries: a theoretical study. *Journal of Molecular Modeling* **2020**, *26* (4), 66. DOI: 10.1007/s00894-020-4326-7.
- (10) Çakır, D.; Sevik, C.; Gülseren, O.; Peeters, F. M. Mo<sub>2</sub>C as a high capacity anode material: a first-principles study. *Journal of Materials Chemistry A* **2016**, *4* (16), 6029-6035, 10.1039/C6TA01918H. DOI: 10.1039/C6TA01918H.
- (11) Zhang, X.; Yu, Z.; Wang, S.-S.; Guan, S.; Yang, H. Y.; Yao, Y.; Yang, S. A. Theoretical prediction of MoN<sub>2</sub> monolayer as a high capacity electrode material for metal ion batteries. *Journal of Materials Chemistry A* **2016**, *4* (39), 15224-15231, 10.1039/C6TA07065E. DOI: 10.1039/C6TA07065E.
- (12) Wang, Y.; Li, Y. Ab initio prediction of two-dimensional Si<sub>3</sub>C enabling high specific capacity as an anode material for Li/Na/K-ion batteries. *Journal of Materials Chemistry A* **2020**, *8* (8), 4274-4282, 10.1039/C9TA11589G. DOI: 10.1039/C9TA11589G.
